# Supplementary material
Source: bioRxiv or medRxiv preprint supplement (https://www.biorxiv.org/content/biorxiv/early/2020/10/15/2020.10.14.340315.1/DC1/embed/media-1.pdf)
Supplement: Supplementary file [file media-1.pdf]

## Supplementary Material

### **Systematic benchmarking of tools for CpG methylation detection from Nanopore sequencing**

Zaka Wing-Sze Yuen<sup>1,2</sup>, Akanksha Srivastava<sup>1,2</sup>, Dennis McNevin<sup>3</sup>, Cameron Jack<sup>2\*</sup>, Eduardo Eyras<sup>1,2,4,5\*</sup>

<sup>1</sup>EMBL Australia Partner Laboratory Network at the Australian National University, Acton ACT 2601, Canberra, Australia

<sup>2</sup>The John Curtin School of Medical Research, Australian National University, Acton ACT 2601, Canberra, Australia

<sup>3</sup>Centre for Forensic Science, School of Mathematical & Physical Sciences, Faculty of Science, University of Technology Sydney, Australia

<sup>4</sup>Catalan Institution for Research and Advanced Studies (ICREA), E08010 Barcelona, Spain

<sup>5</sup>Hospital del Mar Medical Research Institute (IMIM), E08003 Barcelona, Spain

\* co-corresponding authors: [cameron.jack@anu.edu.au](mailto:cameron.jack@anu.edu.au), [eduardo.eyras@anu.edu.au](mailto:eduardo.eyras@anu.edu.au)

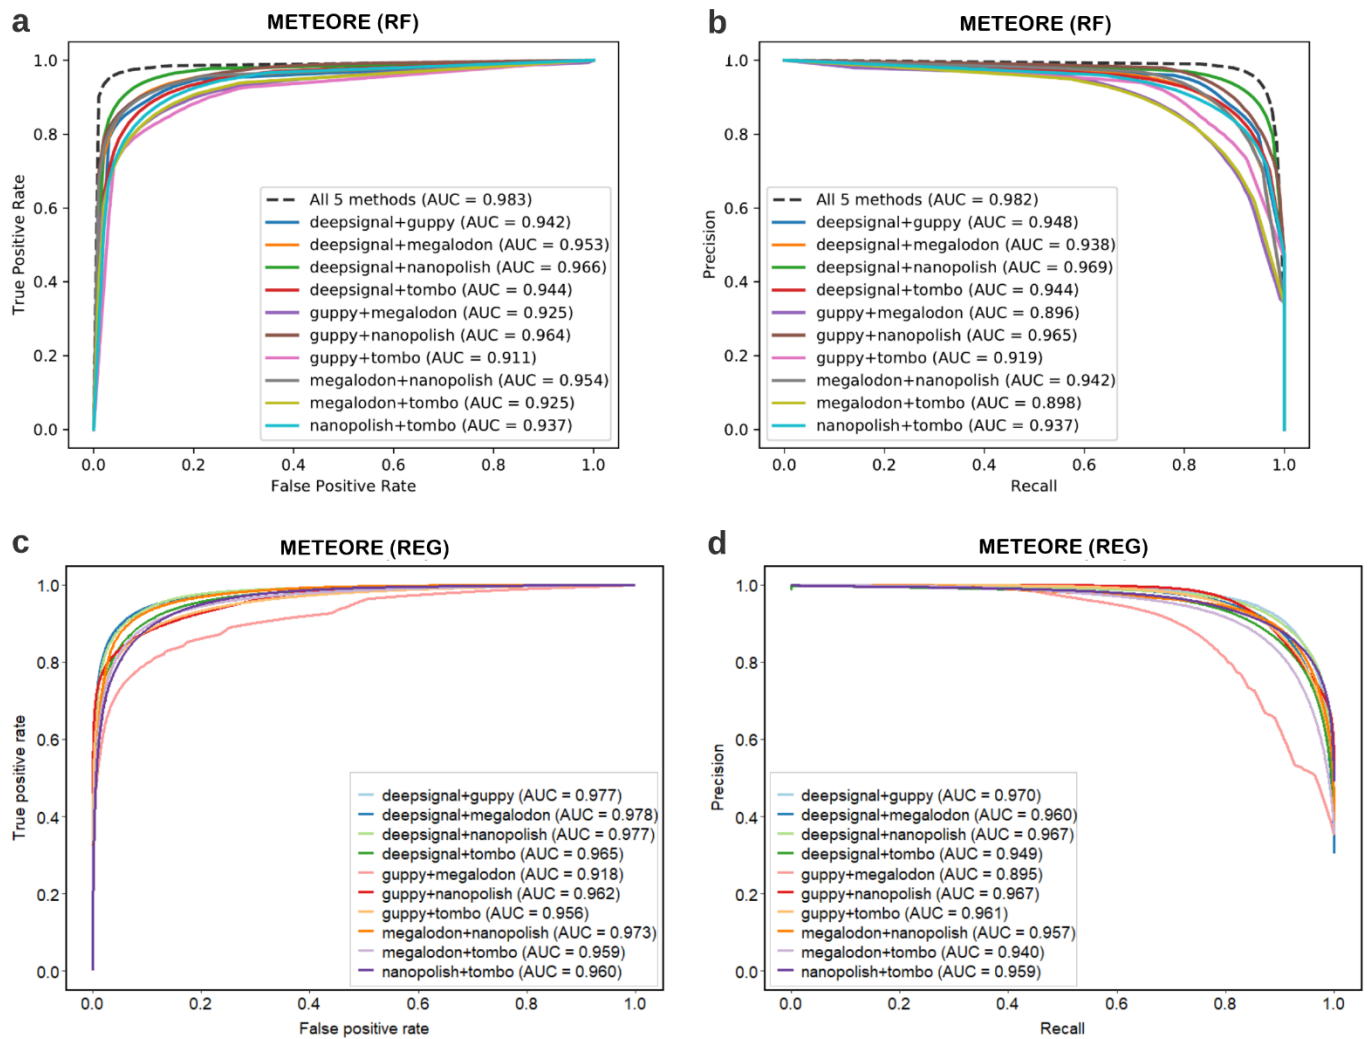

**Supplementary Figure 1. Model accuracy for METEORE at the individual read level. (a)** Receiver operating characteristic (ROC) curves showing the false positive rate (x axis) and true positive rate (y axis) for the predictions of the METEORE random forest (RF) model combining two methods (with default parameters:  $n\_estimator = 10$  and  $max\_depth = None$ ) using the sites of the mixture dataset 1 at individual read level. The curves were built from the average of a 10-fold cross validation. **(b)** Precision-recall (PR) curves showing the recall (x axis) and precision (y axis) for the RF model using the sites of the mixture dataset 1 at individual read level, also built from 10-fold cross validation. **(c)** ROC curves for the METEORE regression (REG) model combining two methods at individual read level. Curves were built from a 5-fold cross validation using the sites of mixture dataset 1. **(d)** PR curves for the METEORE REG model using the sites of the mixture dataset 1 at individual read level, built from a 5-fold cross validation.

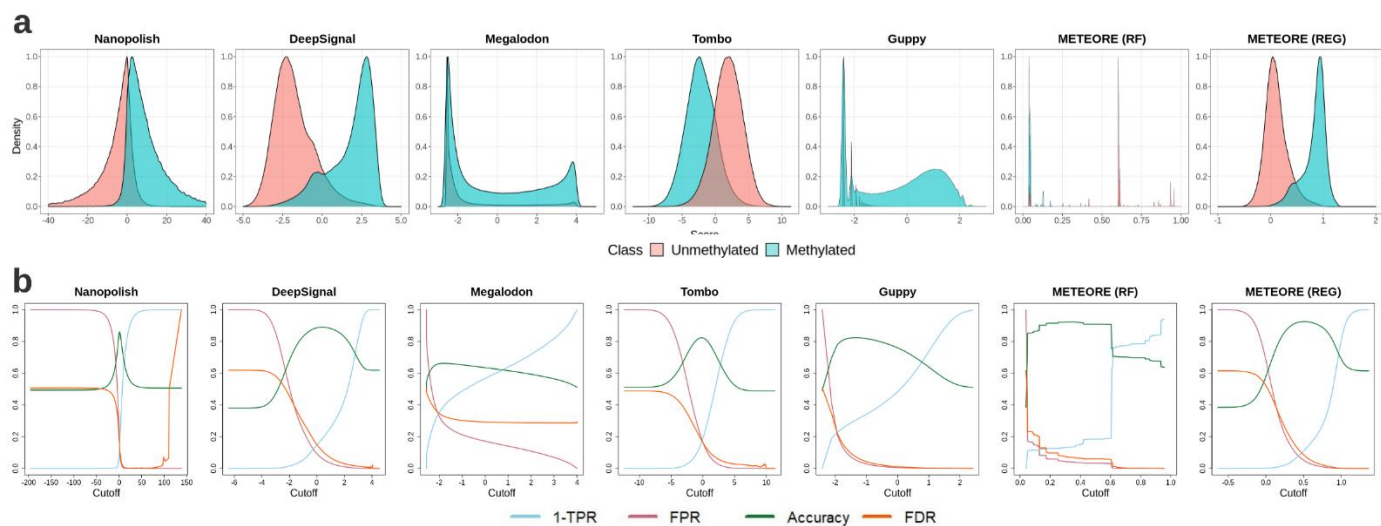

**Supplementary Figure 2. Score distributions and accuracy metrics.** (a) Score (x axis) distribution for methylated and unmethylated sites in individual reads for each tested tool on the mixture dataset 1, including METEORE. We used METEORE combining the predictions of Nanopolish and DeepSignal with a random forest (RF) (parameters: max\_dep=3 and n\_estimator=10) and with a regression model (REG). (b) Distribution of various accuracy metrics (y axis) according to the score (x axis) for each method shown in (a). We show the false positive rate (FPR), false discovery rate (FDR), 1 - true positive rate (TPR), and Accuracy curves as a function of the single score (x axis) cutoff for each tool, where  $FPR = FP/(FP+TN)$ ,  $TPR = TP/(TP+FN)$ ,  $FDR = FP/(TP+FP)$ ,  $accuracy = (TP + TN)/(TP + TN + FP + FN)$ ; and TP = true positives, FP = false positives, TN = true negatives, and FN = false negatives.

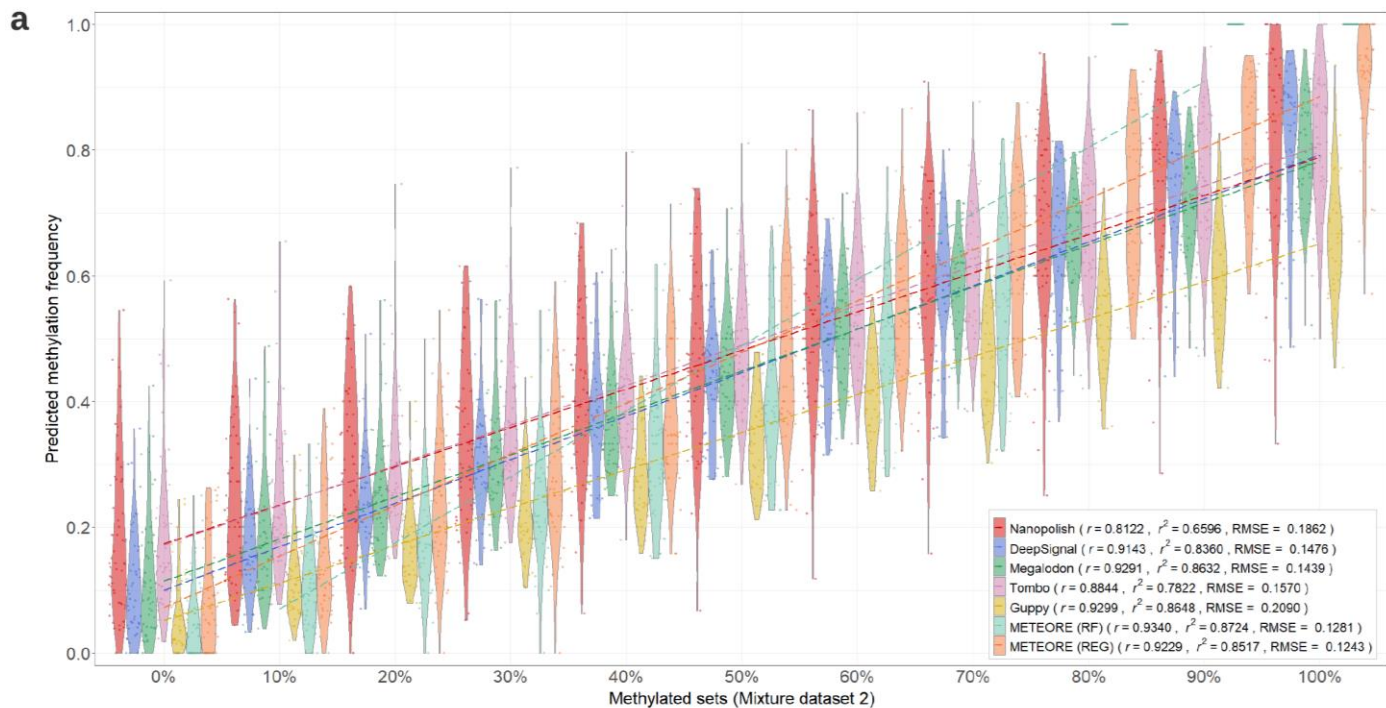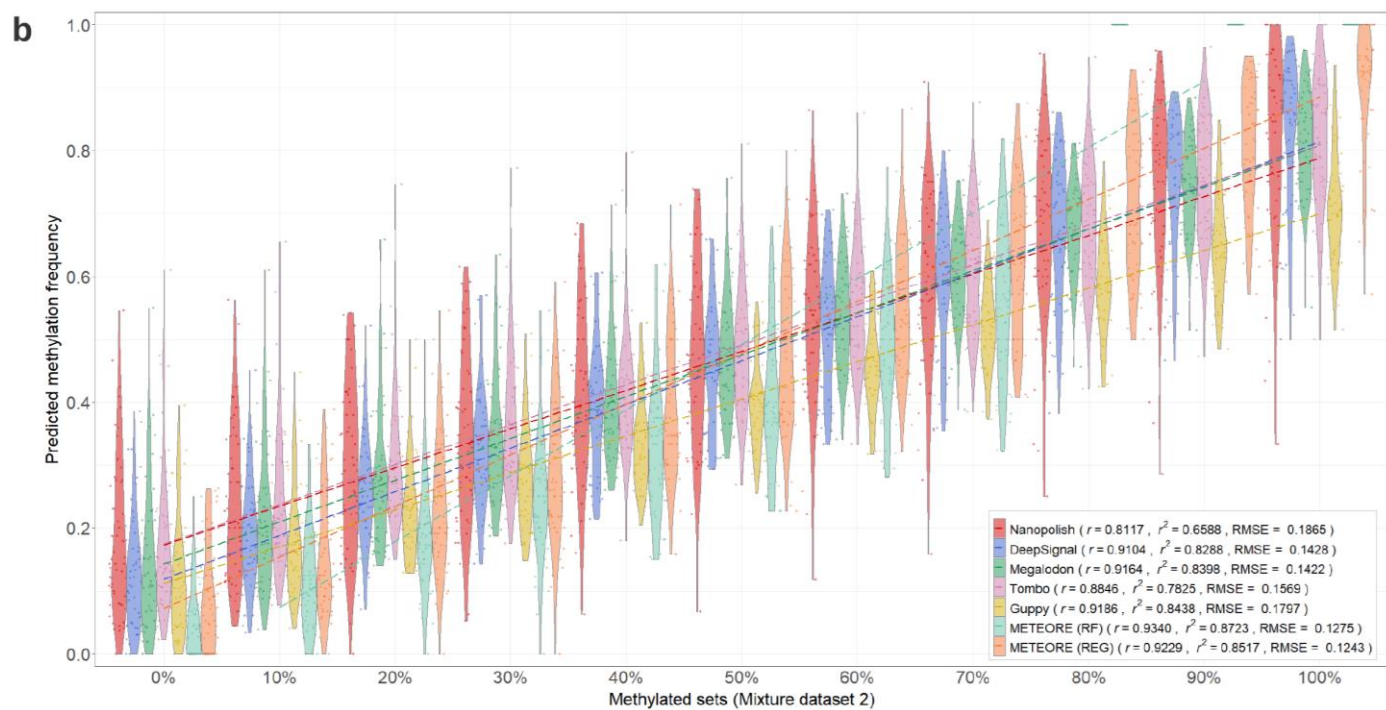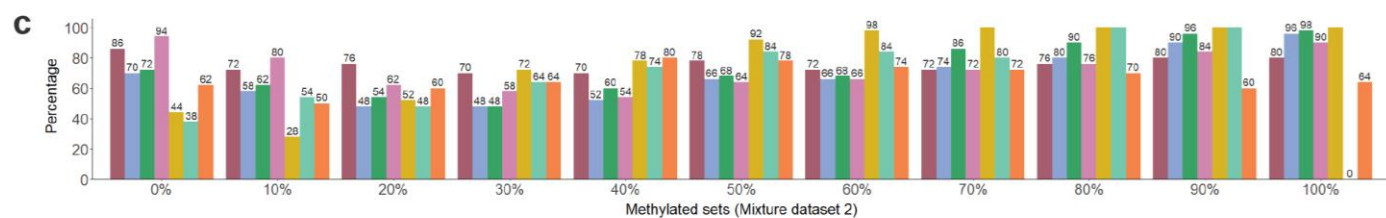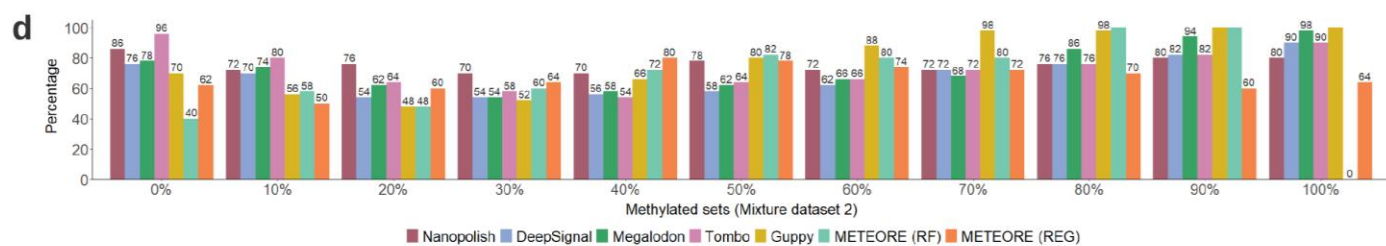

**Supplementary Figure 3. Accuracy analysis of five individual tested tools using a single optimal cutoff.**

Violin plots showing the predicted methylation frequencies (y axis) for each control mixture set with a given proportion of methylated reads (x axis) from the mixture dataset 2 for the five tested tools plus METEORE combining Nanopolish and DeepSignal using random forest (RF) and regression (REG) models with the optimal threshold obtained by **(a)** the maximum value of (TPR-FPR) or **(b)** the minimum value of  $FPR^2 + (1-TPR)^2$ . Score thresholds are given in Supp. Table 3. The Pearson's correlation (r), coefficient of determination ( $r^2$ ) and the root mean square error (RMSE) are given for each tool. **(c)** Barplot showing the proportion of sites predicted outside a 10% window around the expected methylation proportion for each method with the optimal threshold obtained by the maximum value of (TPR-FPR). Each predicted site in the m% dataset was classified as "outside" if its predicted percentage methylation was outside the interval [ (m-5)%, (m+5)% ] for intermediate methylation values, or outside the intervals [0,5%] or [95%,100%] for the fully unmethylated or fully methylated sets, respectively. **(d)** Barplot showing the proportion of sites predicted outside a 10% window around the expected methylation proportion for each method with the optimal threshold obtained by the minimum value of  $FPR^2 + (1-TPR)^2$ . TPR = true positive rate, FPR = false positive rate.

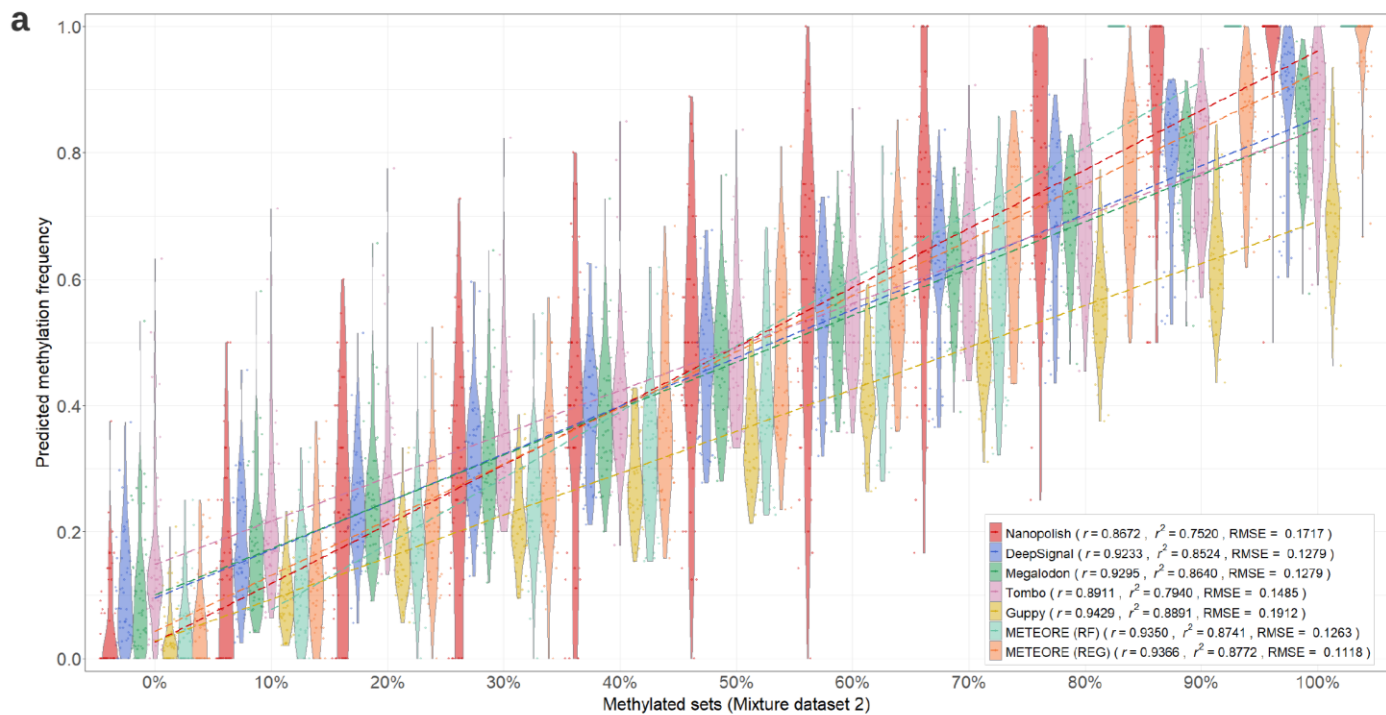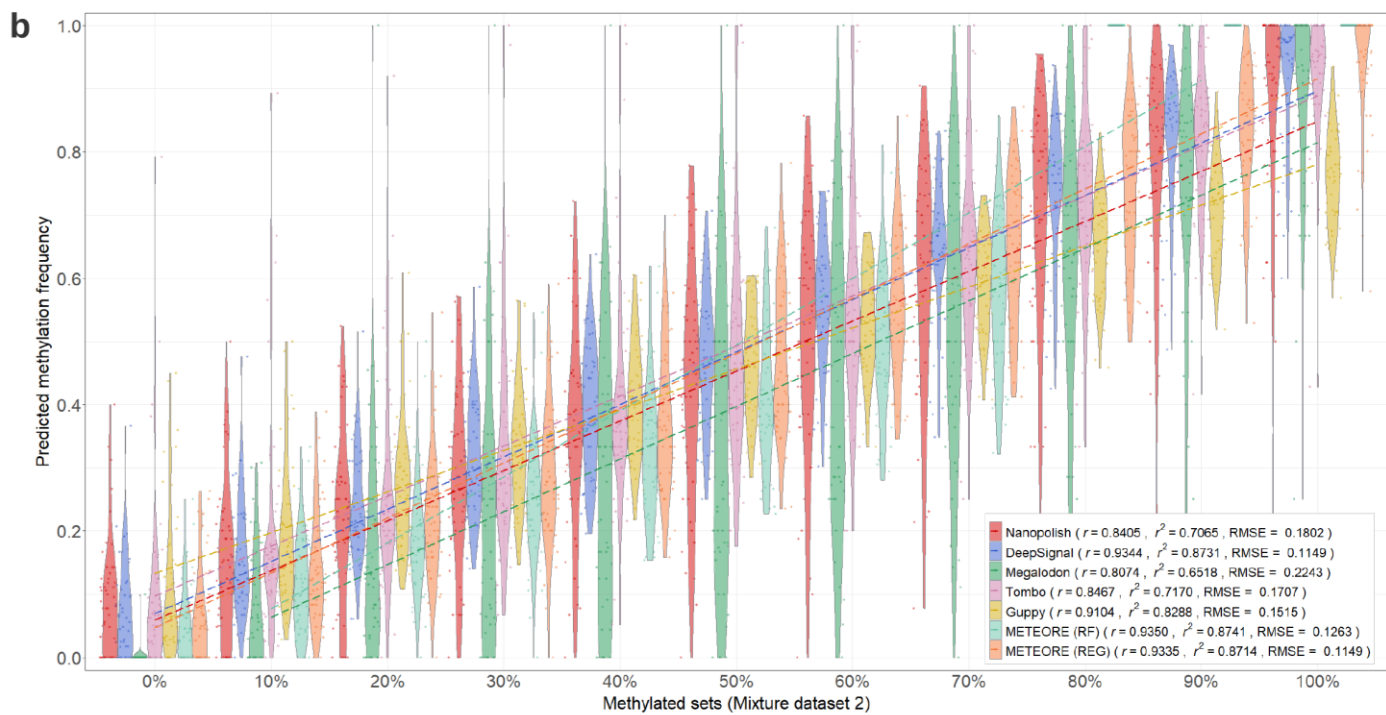

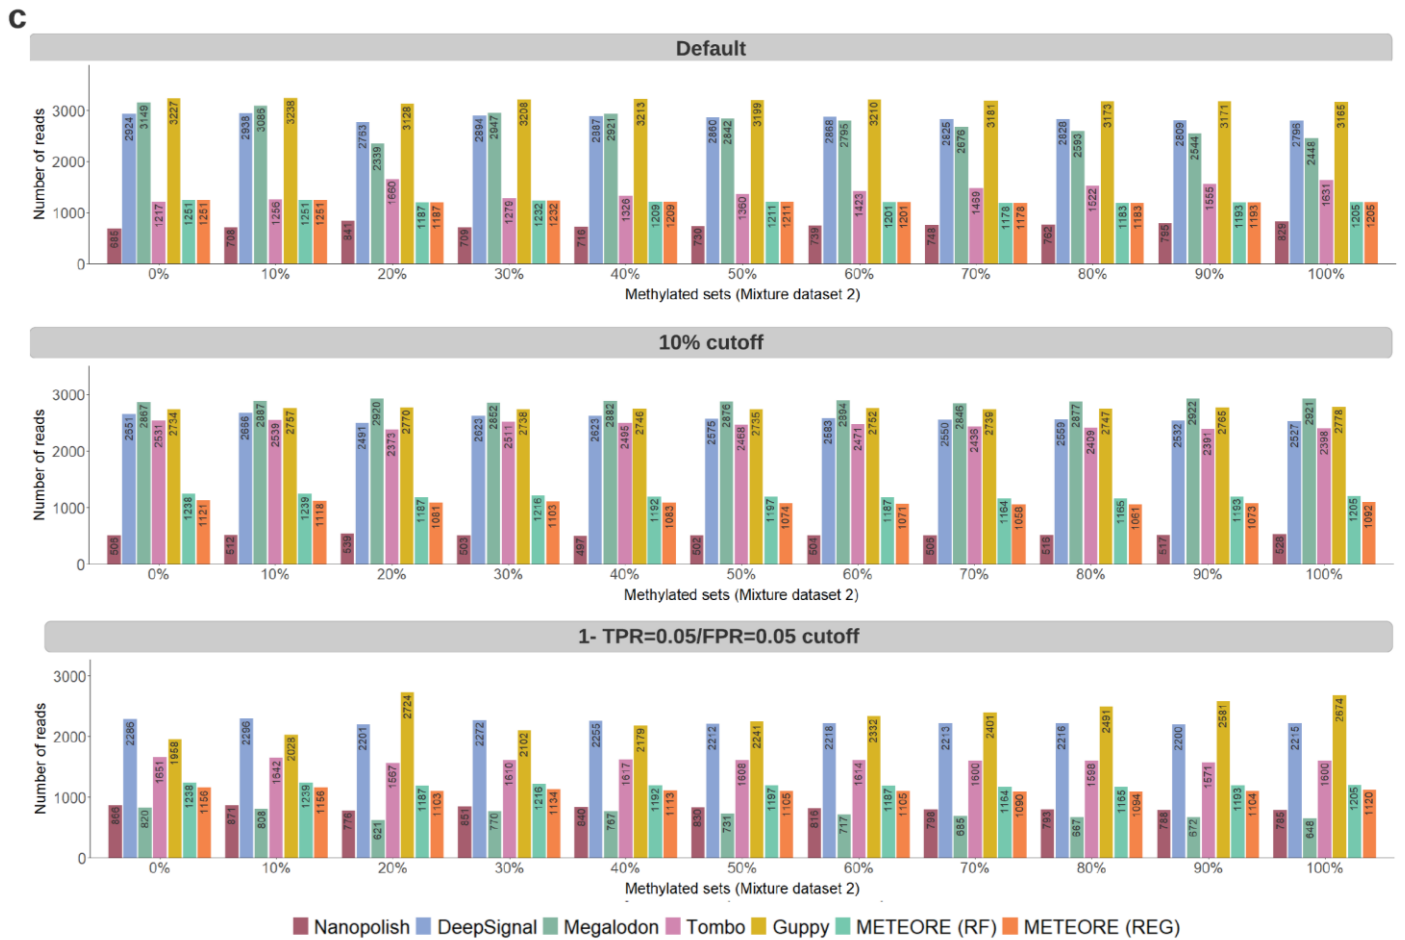

**Supplementary Figure 4. Accuracy analysis using a double cutoff and discarding reads.** (a) Violin plots showing the predicted methylation frequencies (y axis) for each control mixture set with a given proportion of methylated reads (x axis) from the mixture dataset 2 for the five tested tools plus METEORE combining Nanopolish and DeepSignal using random forest (RF) and regression (REG) models, after discarding 10% of the reads with a score closest to the value corresponding to the intersection between FPR and 1-TPR. See Supp. Table 4 for the cutoff values. The Pearson's correlation ( $r$ ), coefficient of determination ( $r^2$ ) and the root mean square error (RMSE) are given for each tool. (b) Similar plot as (a) but considering the scores at which  $FPR=0.05$  and  $1-TPR=0.05$  and removing all sites in reads with a score between these two values. See Supp. Table 4 for the cutoff values. (c) Number of reads used by each method in different approach: default setting of each method (top), the use of a double cutoff to remove 20% of the reads (middle) and the use of a double cutoff to remove reads with the scores between the cutoff values at  $FPR=0.05$  and  $1-TPR=0.05$  (bottom).

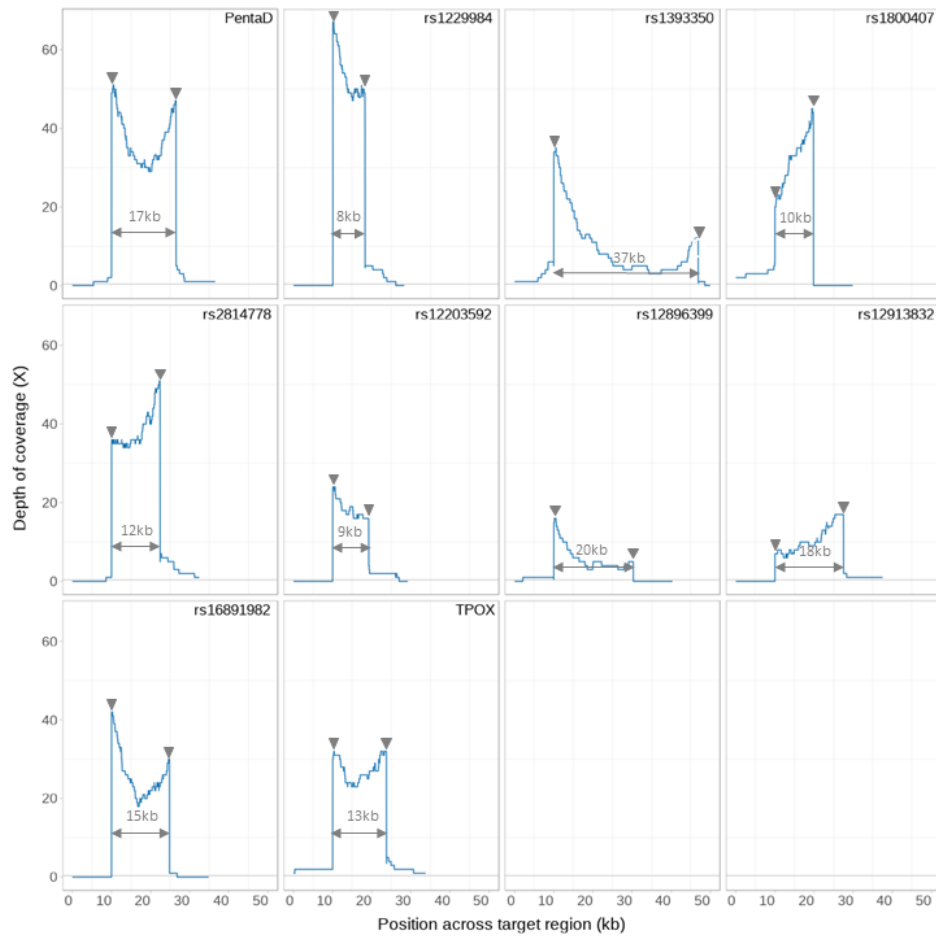

**Supplementary Figure 5. Coverage plots for the 10 regions targeted with the nCATS protocol. (a)** For each of our 10 sequenced regions (Supp. Table 4) we show the number of reads (y axis) aligning at each position along the region (x axis). The boundaries and length of each region are also indicated. For the coverage, reads mapped in forward and reverse were considered.



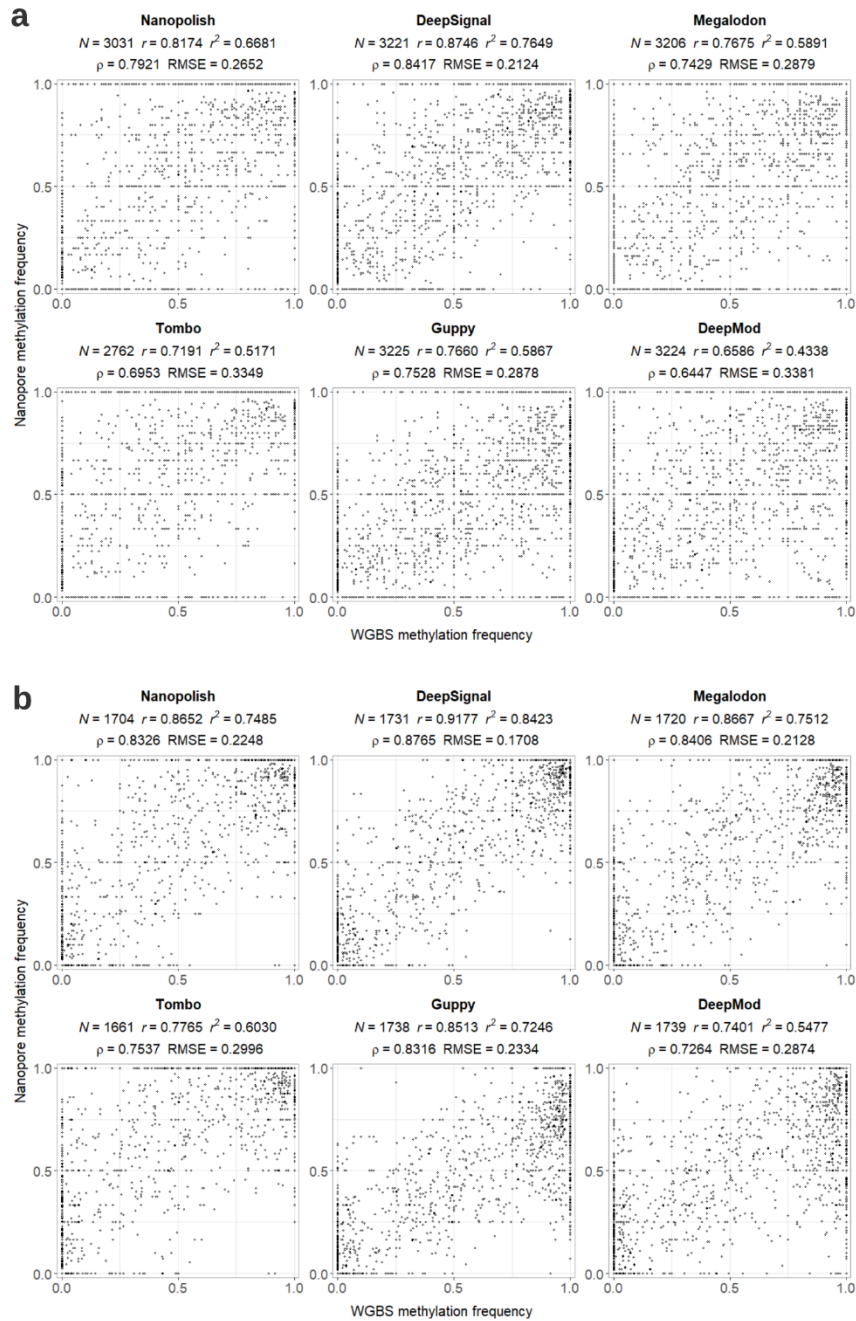

**Supplementary Figure 6. Comparison of the nCATS data with whole genome bisulfite sequencing (WGBS).** For each tool, we show the methylation fraction predicted by each tool (y axis) and the fraction calculated from WGBS (x axis), using either **(a)** individual predictions on both strands or **(b)** combined predictions from both strands. The number of sites (N), the Pearson's correlation (r), coefficient of determination (r<sup>2</sup>), the Spearman's rank correlation (ρ), and the root mean square error (RMSE) are provided for each tested tool.

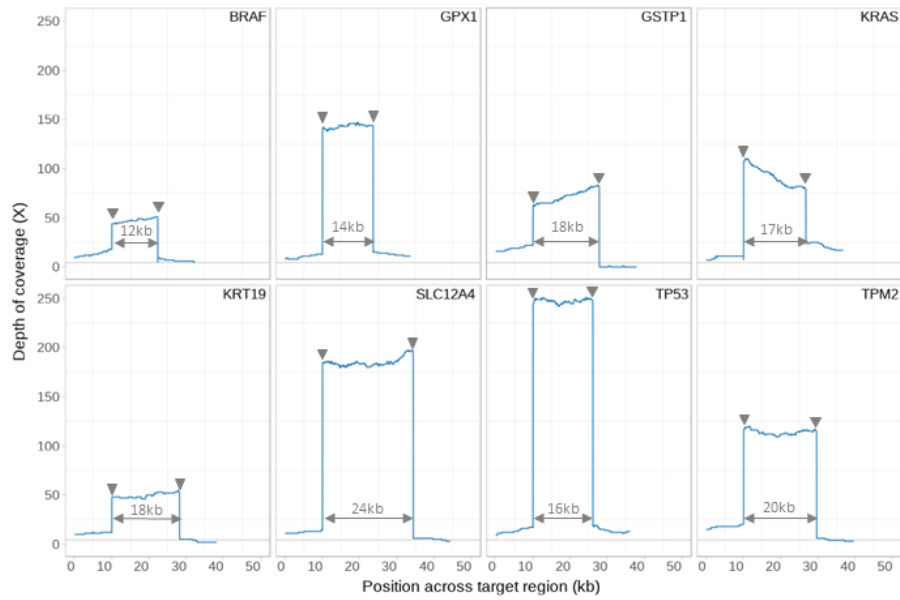

**Supplementary Figure 7. Coverage plots for the regions targeted with the nCATS protocol from Gilpatrick et al. 2020.** For each of the 8 regions tested in Gilpatrick et al. (2020), we show the number of reads (y axis) aligning at each position along the region (x axis). The boundaries and length of each region are also indicated. For the coverage, reads mapped in forward and reverse were considered.

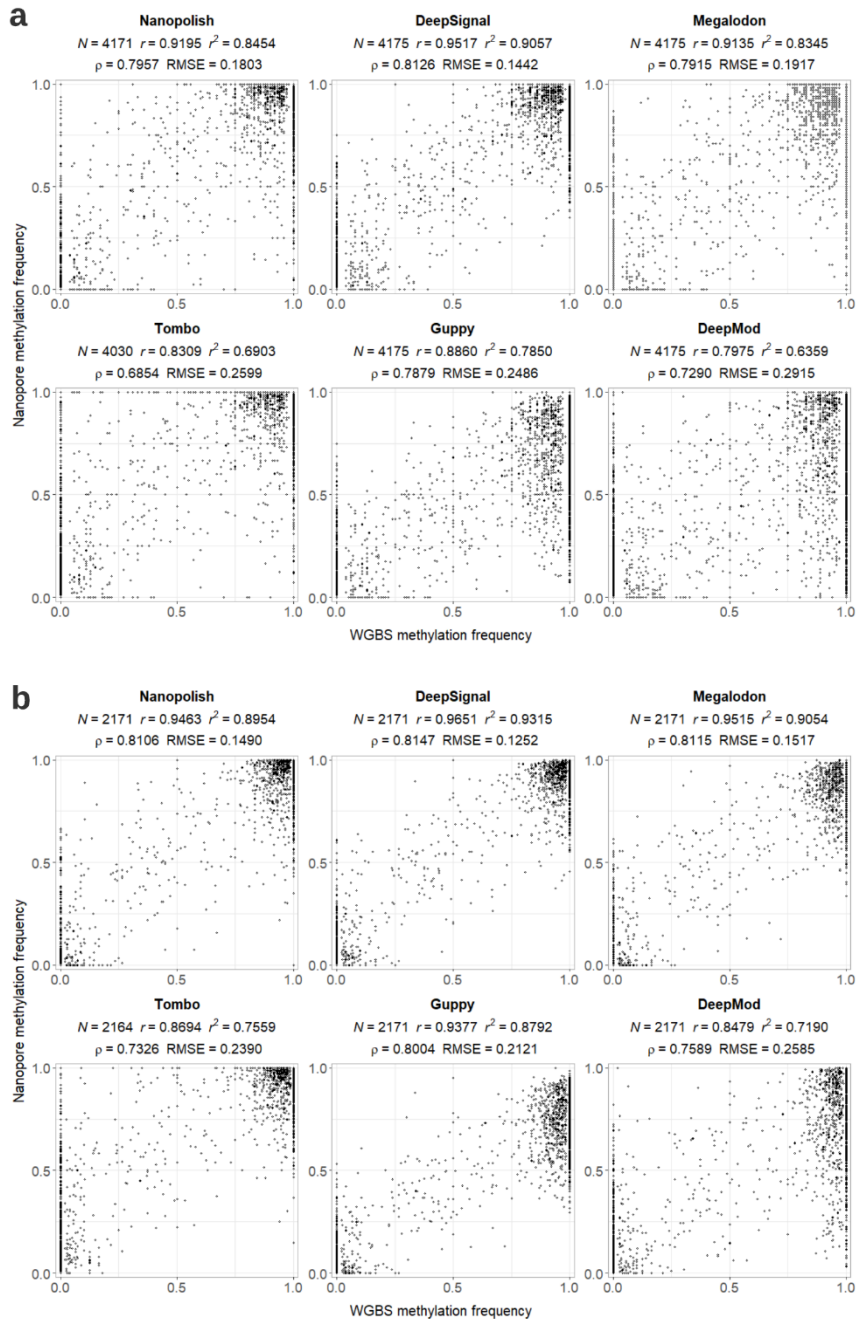

**Supplementary Figure 8. Comparison of the nCATS data from Gilpatrick et al. with whole genome bisulfite sequencing (WGBS) data.** For each tool, we show the methylation fraction predicted by each tool (y axis) and the fraction calculated from WGBS (x axis), using either **(a)** individual predictions on both strands or **(b)** combined predictions from both strands. The number of sites (N), the Pearson's correlation (r), coefficient of determination (r<sup>2</sup>), the Spearman's rank correlation (ρ), and the root mean square error (RMSE) are provided for each tested tool.

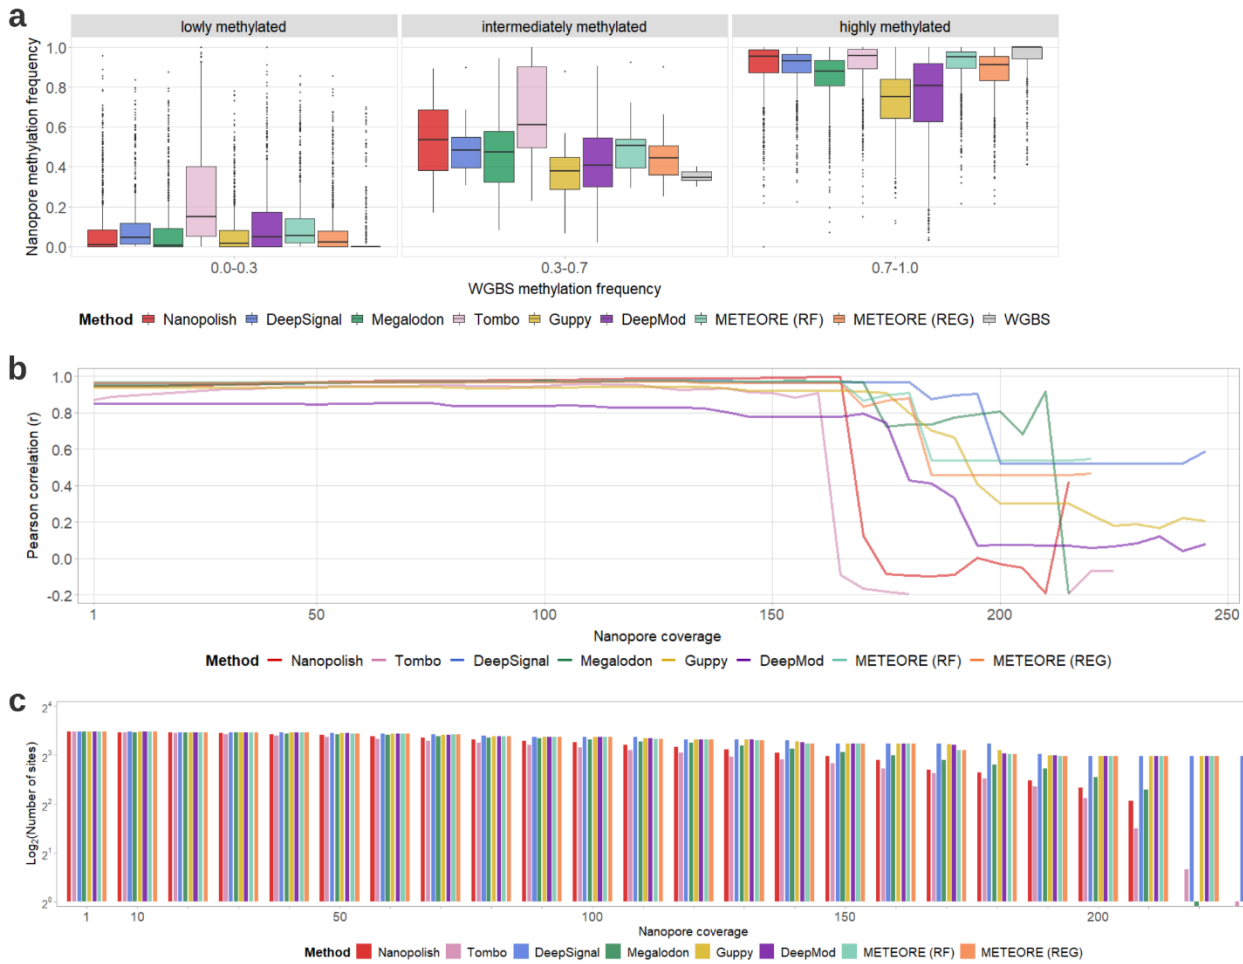

**Supplementary Figure 9. Comparison of CpG methylation frequencies from whole genome bisulfite sequencing (WGBS) Illumina data with Cas9-targeted Nanopore data from Gilpatrick et al. (a)** Distribution of nanopore methylation calls across three WGBS methylation bins unmethylated or lowly methylated (0.0-0.3), intermediate methylation (0.3-0.7), and highly or fully methylated (0.7-1.0). We show the seven tested tools: Nanopolish, DeepSignal, Megalodon, Tombo, Guppy, DeepMod, and METEORE. For METEORE, we used the combination of Nanopolish and DeepSignal using either a random forest model (RF) or a regression model (REG). **(b)** Pearson's correlation ( $r$ ) (y axis) between nanopore methylation frequencies calculated from Nanopore by each of the tested tools and WGBS at sites with predictions from both strands combined at each level of minimal coverage, i.e. minimum number of Nanopore reads considered (x axis). **(c)** Number of sites on a logarithmic scale (y axis) considered at each value of minimum coverage in (b). METEORE (RF) is the combination of DeepSignal and Nanopolish using a random forest (parameters: max\_depth=3 and n\_estimator=10). METEORE (REG) is the combination of DeepSignal and Nanopolish using a regression model.

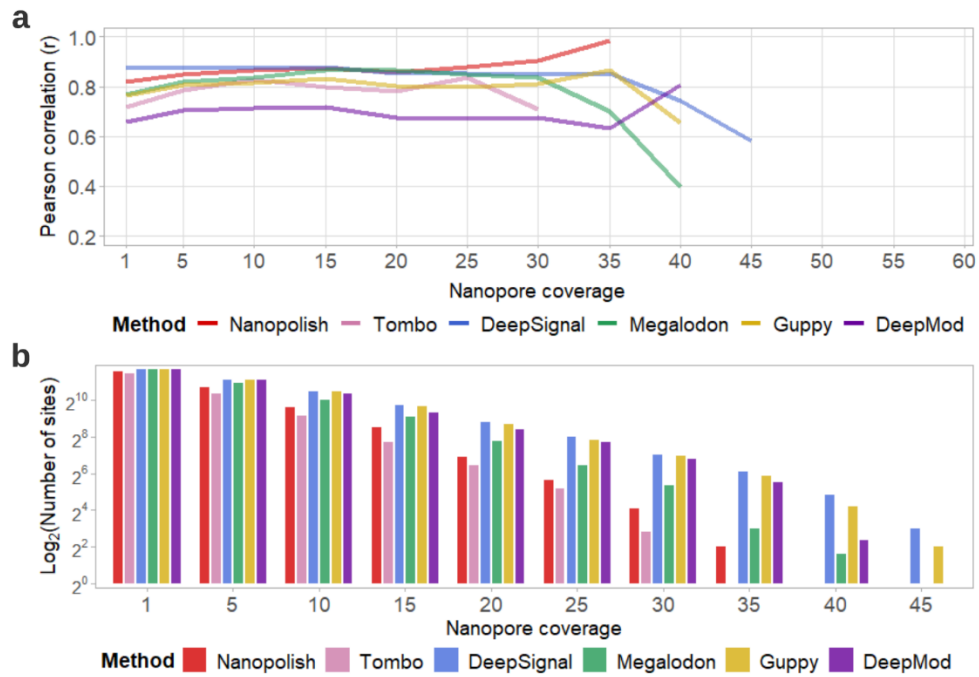

**Supplementary Figure 10.** (a) Pearson’s correlation (r) (y axis) between nanopore methylation frequencies calculated from Nanopore by each of the tested tools and WGBS at individual sites at each level of minimal coverage, i.e. minimum number of Nanopore reads considered (x axis). (b) Number of sites on a logarithmic scale (y axis) considered at each value of minimum coverage in (b). METEORE is not included since it performs prediction only combining both strands.

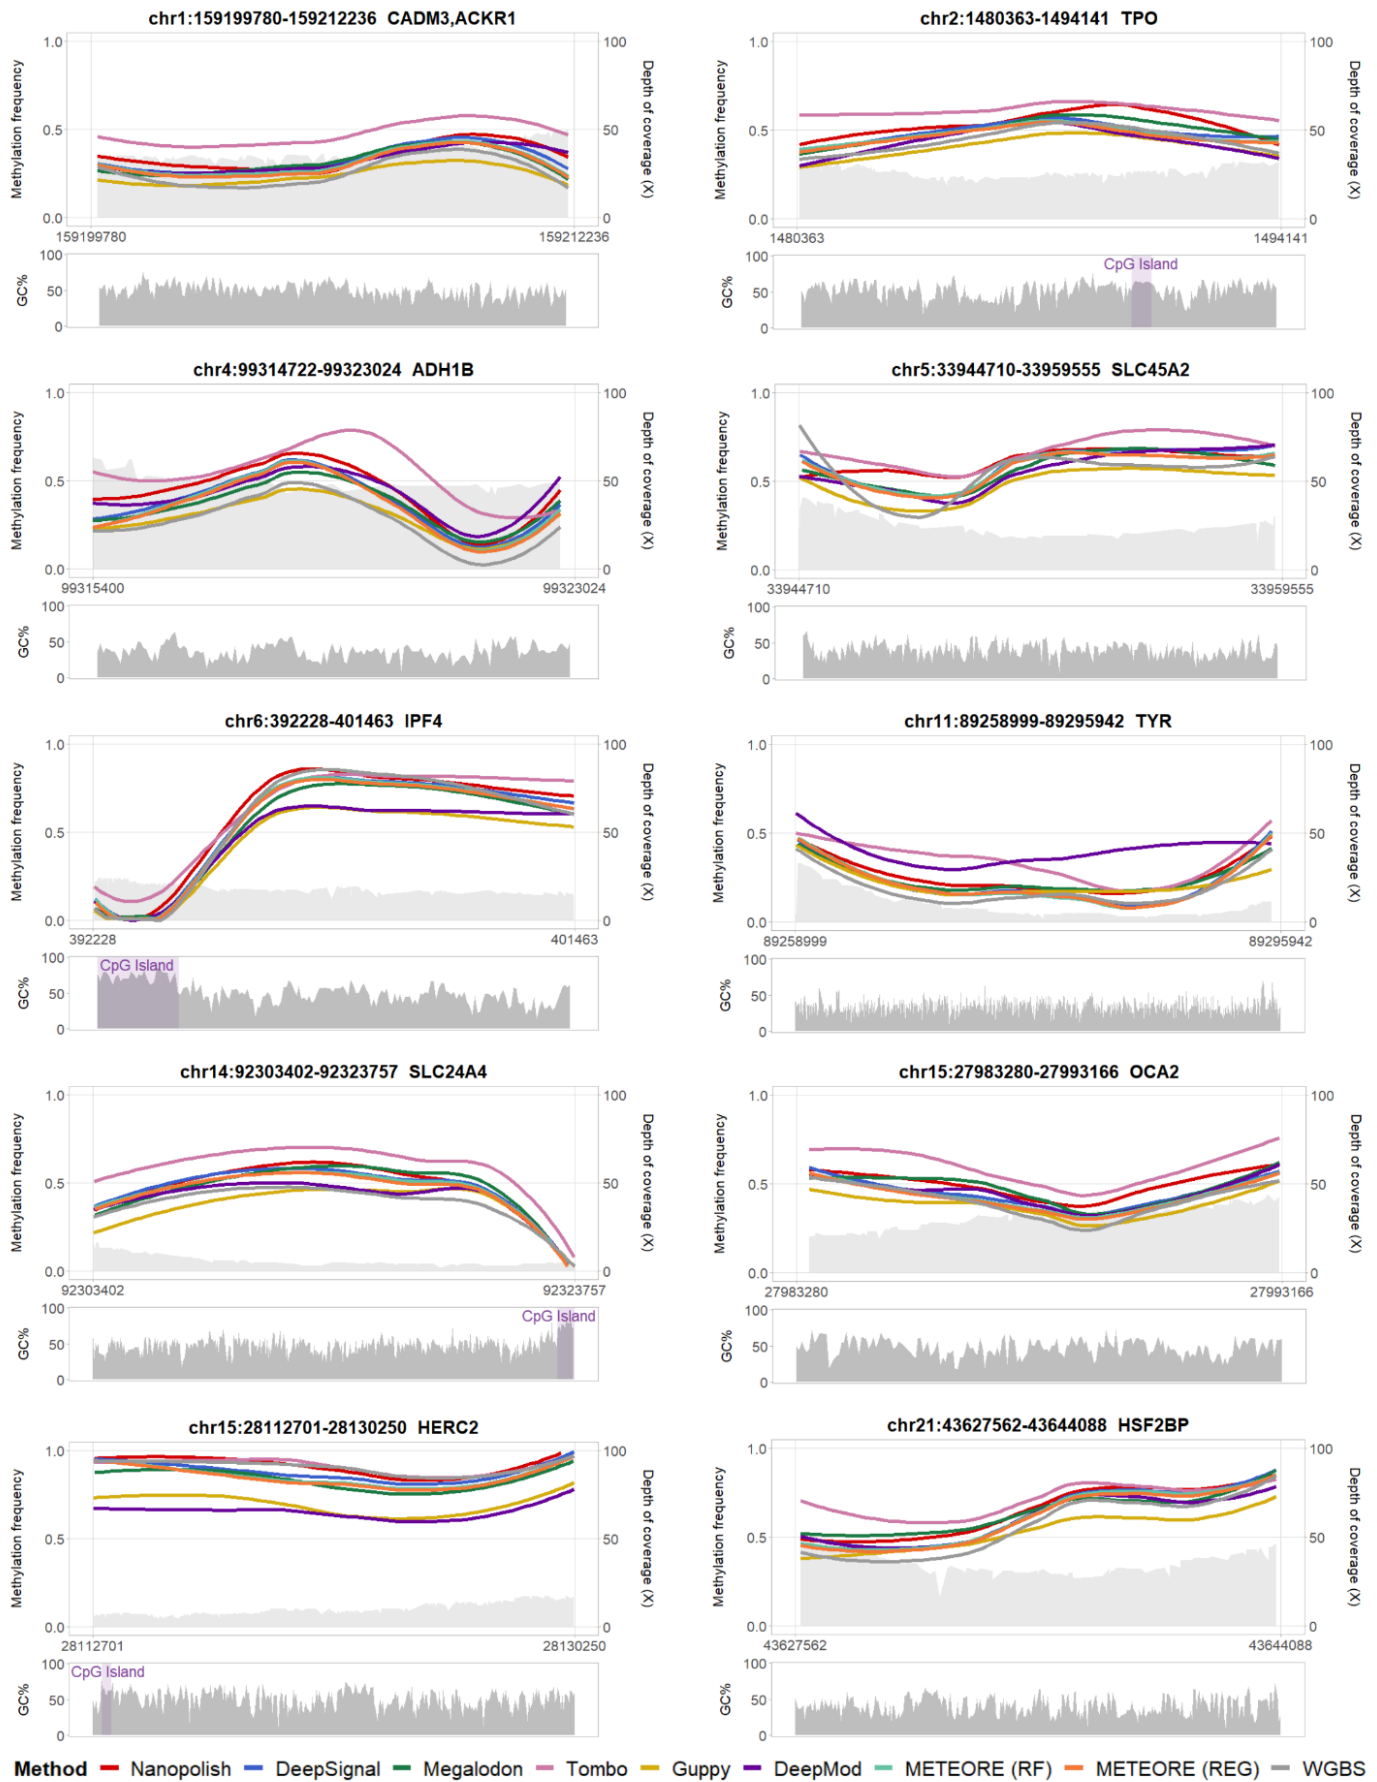

**Supplementary Figure 11. Comparison of CpG methylation frequencies from WGBS and Nanopore across our 10 targeted regions.** LOESS smoothing line plots of methylation calls from WGBS Illumina and Nanopore data detected by the seven tested tools: Nanopolish, DeepSignal, Megalodon, Tombo, Guppy, DeepMod, and METEORE. We show METEORE with the combination of Nanopolish and DeepSignal using

either a random forest model (RF) or a regression model (REG). The plots include the Nanopore coverage, shown as a light grey area. Below, we include the GC content of the region.

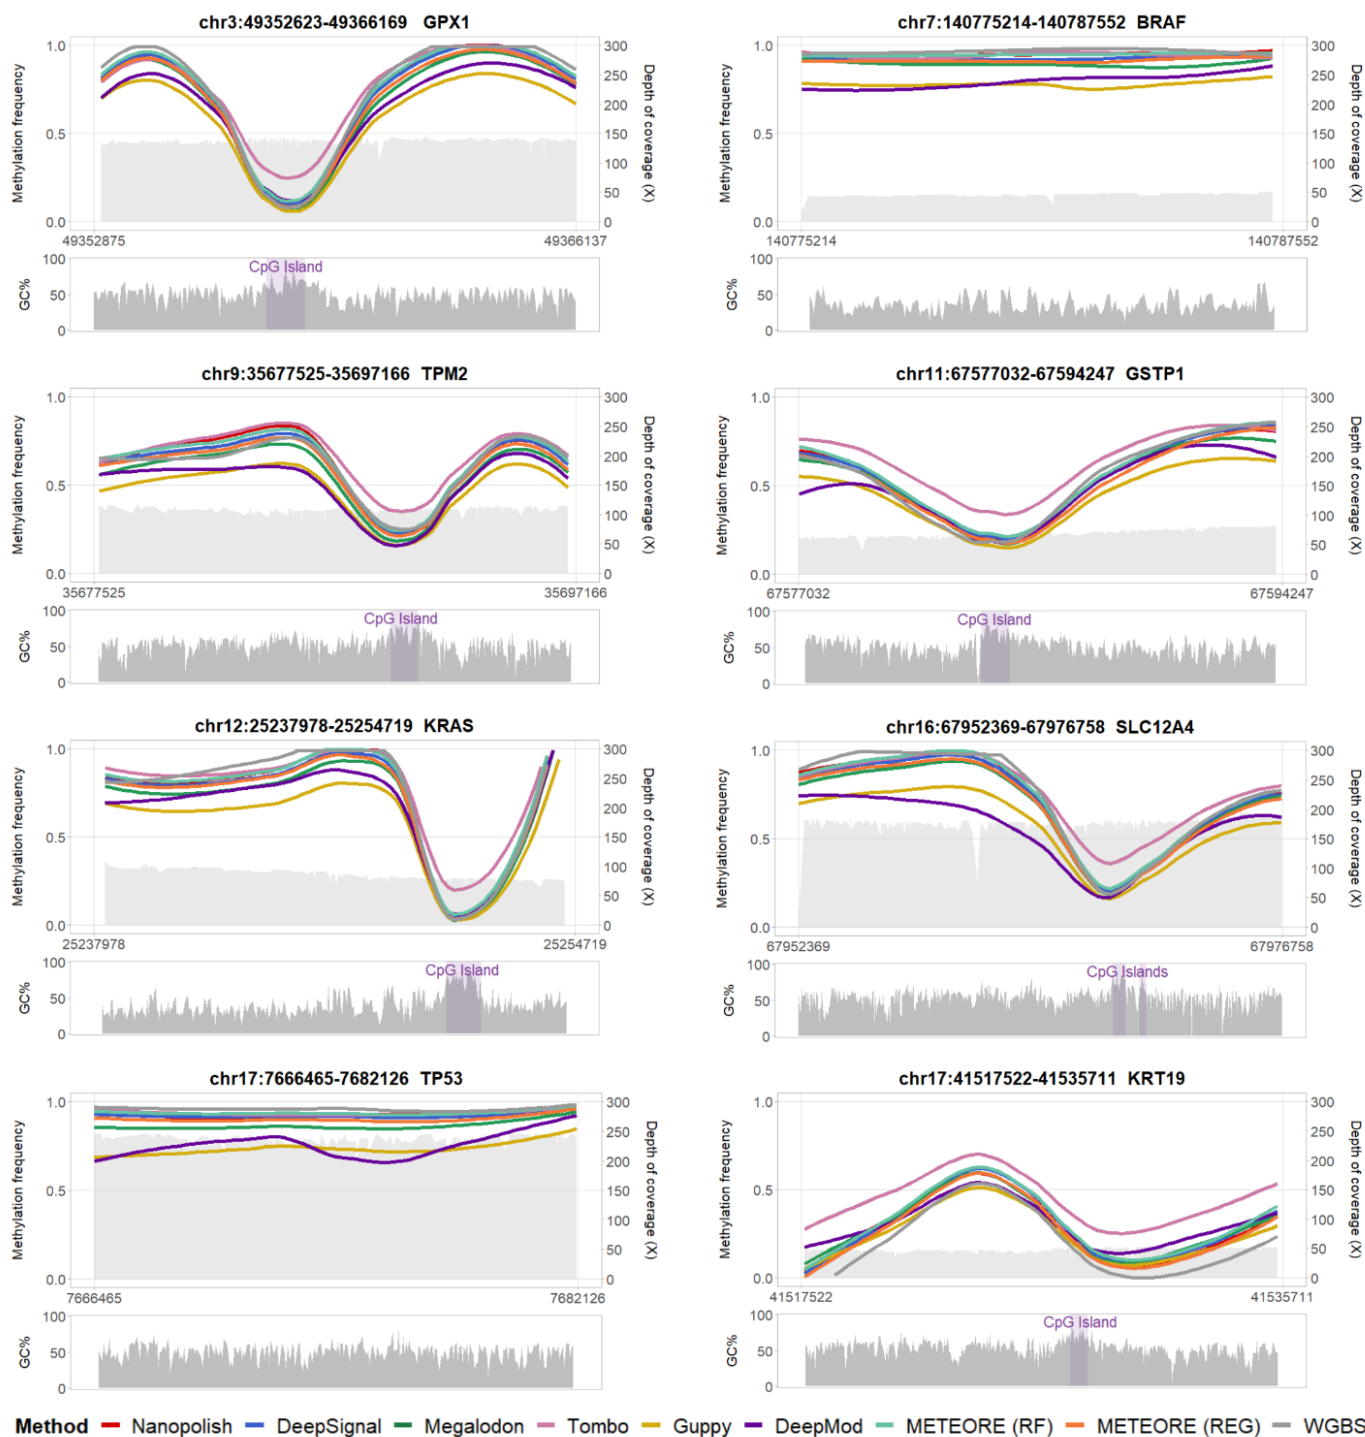

**Supplementary Figure 12. Comparison of CpG methylation frequencies from WGBS and Nanopore across the 8 regions tested in Gilpatrick et al.** LOESS smoothing line plots of methylation calls from WGBS Illumina and Nanopore data detected by the seven tested tools: Nanopolish, DeepSignal, Megalodon, Tombo, Guppy, DeepMod, and METEORE. We show METEORE with the combination of Nanopolish and DeepSignal using either a random forest model (RF) or a regression model (REG). The plots include the Nanopore coverage, shown as a light grey area. Below, we include the GC content of the region.

**a**

| Set name | %          |             | Unmethylated reads (PCR) | Methylated reads (PCR+M.Sssl) |
|----------|------------|-------------|--------------------------|-------------------------------|
|          | methylated | Total reads |                          |                               |
| m0       | 0          | 2390        | 2390                     | 0                             |
| m10      | 10         | 2437        | 2182                     | 255                           |
| m20      | 20         | 2431        | 1946                     | 485                           |
| m30      | 30         | 2434        | 1714                     | 720                           |
| m40      | 40         | 2410        | 1458                     | 952                           |
| m50      | 50         | 2432        | 1231                     | 1201                          |
| m60      | 60         | 2414        | 981                      | 1433                          |
| m70      | 70         | 2420        | 739                      | 1681                          |
| m80      | 80         | 2410        | 498                      | 1912                          |
| m90      | 90         | 2399        | 256                      | 2143                          |
| m100     | 100        | 2225        | 0                        | 2225                          |

**b**

| Set name | %          |             | Unmethylated reads (PCR) | Methylated reads (PCR+M.Sssl) |
|----------|------------|-------------|--------------------------|-------------------------------|
|          | methylated | Total reads |                          |                               |
| m0       | 0          | 3420        | 3420                     | 0                             |
| m10      | 10         | 3426        | 3081                     | 345                           |
| m20      | 20         | 3413        | 2745                     | 668                           |
| m30      | 30         | 3423        | 2410                     | 1013                          |
| m40      | 40         | 3415        | 2068                     | 1347                          |
| m50      | 50         | 3434        | 1736                     | 1698                          |
| m60      | 60         | 3403        | 1377                     | 2026                          |
| m70      | 70         | 3406        | 1039                     | 2367                          |
| m80      | 80         | 3398        | 690                      | 2708                          |
| m90      | 90         | 3396        | 354                      | 3042                          |
| m100     | 100        | 3383        | 0                        | 3383                          |

**Supplementary Table 1. Methylation control mixtures.** We describe the mixture dataset 1 (**a**) and 2 (**b**) used for the benchmarking of different methylation proportions built from fully unmethylated and fully methylated reads.



| <b>Unmethylated if freq &lt; 0.1, methylated if freq &gt; 0.9</b> |          |             |           |        |            |
|-------------------------------------------------------------------|----------|-------------|-----------|--------|------------|
|                                                                   | Accuracy | Specificity | Precision | Recall | Error rate |
| <b>Nanopolish</b>                                                 | 0.675    | 0.490       | 0.628     | 0.860  | 0.325      |
| <b>DeepSignal</b>                                                 | 0.410    | 0.590       | 0.359     | 0.230  | 0.590      |
| <b>Megalodon</b>                                                  | 0.500    | 1.000       | NA        | 0.000  | 0.500      |
| <b>Tombo</b>                                                      | 0.588    | 0.384       | 0.564     | 0.790  | 0.412      |
| <b>Guppy</b>                                                      | 0.500    | 1.000       | NA        | 0.000  | 0.500      |
| <b>DeepMod</b>                                                    | 0.495    | 0.680       | 0.492     | 0.310  | 0.505      |

| <b>Unmethylated if freq &lt; 0.2, methylated if freq &gt; 0.8</b> |          |             |           |        |            |
|-------------------------------------------------------------------|----------|-------------|-----------|--------|------------|
|                                                                   | Accuracy | Specificity | Precision | Recall | Error rate |
| <b>Nanopolish</b>                                                 | 0.860    | 0.800       | 0.821     | 0.920  | 0.140      |
| <b>DeepSignal</b>                                                 | 0.805    | 0.910       | 0.886     | 0.700  | 0.195      |
| <b>Megalodon</b>                                                  | 0.510    | 1.000       | 1.000     | 0.020  | 0.490      |
| <b>Tombo</b>                                                      | 0.794    | 0.616       | 0.719     | 0.970  | 0.206      |
| <b>Guppy</b>                                                      | 0.500    | 1.000       | NA        | 0.000  | 0.500      |
| <b>DeepMod</b>                                                    | 0.790    | 0.970       | 0.953     | 0.610  | 0.210      |

| <b>Unmethylated if freq &lt; 0.3, methylated if freq &gt; 0.7</b> |          |             |           |        |            |
|-------------------------------------------------------------------|----------|-------------|-----------|--------|------------|
|                                                                   | Accuracy | Specificity | Precision | Recall | Error rate |
| <b>Nanopolish</b>                                                 | 0.935    | 0.900       | 0.907     | 0.970  | 0.065      |
| <b>DeepSignal</b>                                                 | 0.930    | 1.000       | 1.000     | 0.860  | 0.070      |
| <b>Megalodon</b>                                                  | 0.600    | 1.000       | 1.000     | 0.200  | 0.400      |
| <b>Tombo</b>                                                      | 0.839    | 0.697       | 0.766     | 0.980  | 0.161      |
| <b>Guppy</b>                                                      | 0.505    | 1.000       | 1.000     | 0.010  | 0.495      |
| <b>DeepMod</b>                                                    | 0.935    | 1.000       | 1.000     | 0.870  | 0.065      |

| <b>Unmethylated if freq &lt; 0.4, methylated if freq &gt; 0.6</b> |          |             |           |        |            |
|-------------------------------------------------------------------|----------|-------------|-----------|--------|------------|
|                                                                   | Accuracy | Specificity | Precision | Recall | Error rate |
| <b>Nanopolish</b>                                                 | 0.955    | 0.930       | 0.933     | 0.980  | 0.045      |
| <b>DeepSignal</b>                                                 | 0.975    | 1.000       | 1.000     | 0.950  | 0.025      |
| <b>Megalodon</b>                                                  | 0.755    | 1.000       | 1.000     | 0.510  | 0.245      |
| <b>Tombo</b>                                                      | 0.884    | 0.778       | 0.818     | 0.990  | 0.116      |
| <b>Guppy</b>                                                      | 0.600    | 1.000       | 1.000     | 0.200  | 0.400      |
| <b>DeepMod</b>                                                    | 0.975    | 1.000       | 1.000     | 0.950  | 0.025      |

| <b>Unmethylated if freq &lt; 0.5, methylated if freq &gt; 0.5</b> |          |             |           |        |            |
|-------------------------------------------------------------------|----------|-------------|-----------|--------|------------|
|                                                                   | Accuracy | Specificity | Precision | Recall | Error rate |
| <b>Nanopolish</b>                                                 | 0.975    | 0.970       | 0.970     | 0.980  | 0.025      |
| <b>DeepSignal</b>                                                 | 0.990    | 1.000       | 1.000     | 0.980  | 0.010      |
| <b>Megalodon</b>                                                  | 0.880    | 1.000       | 1.000     | 0.760  | 0.120      |
| <b>Tombo</b>                                                      | 0.915    | 0.838       | 0.861     | 0.990  | 0.085      |
| <b>Guppy</b>                                                      | 0.720    | 1.000       | 1.000     | 0.440  | 0.280      |
| <b>DeepMod</b>                                                    | 0.980    | 1.000       | 1.000     | 0.960  | 0.020      |

**Supplementary Table 2. Per-site performance.** The table shows the accuracies in fully methylated or fully unmethylated CpG sites for the six tested tools using two different methylation frequency thresholds to classify methylated and unmethylated sites. For each pair of thresholds (a,b), we defined a site to be unmethylated if the predicted methylation frequency was <a, and methylated if the predicted methylation frequency was >b, for (a,b) = (0.1,0.9), (0.2,0.8), (0.3,0.7), (0.4,0.6), and (0.5,0.5).

|                                    | Nanopolish                            | DeepSignal                             | Megalodon                              | Tombo                                  | Guppy                                  | METEORE (RF)                          | METEORE (REG)                         |
|------------------------------------|---------------------------------------|----------------------------------------|----------------------------------------|----------------------------------------|----------------------------------------|---------------------------------------|---------------------------------------|
| Maximum of (TPR - FPR)             | Cutoff= 1.03<br>TPR =0.87<br>FPR=0.15 | Cutoff= -0.05<br>TPR =0.86<br>FPR=0.10 | Cutoff= -1.86<br>TPR =0.61<br>FPR=0.30 | Cutoff= -0.13<br>TPR =0.83<br>FPR=0.18 | Cutoff= -1.35<br>TPR =0.69<br>FPR=0.05 | Cutoff= 0.32<br>TPR =0.87<br>FPR=0.04 | Cutoff= 0.43<br>TPR =0.92<br>FPR=0.08 |
| Minimum of $(FPR-0)^2 + (TPR-1)^2$ | Cutoff= 1.04<br>TPR=0.87<br>FPR=0.15  | Cutoff= -0.19<br>TPR =0.87<br>FPR=0.11 | Cutoff= -1.97<br>TPR =0.64<br>FPR=0.32 | Cutoff= -0.11<br>TPR =0.82<br>FPR=0.18 | Cutoff= -1.70<br>TPR =0.73<br>FPR=0.12 | Cutoff= 0.25<br>TPR =0.87<br>FPR=0.05 | Cutoff= 0.43<br>TPR =0.92<br>FPR=0.08 |

**Supp. Table 3.** Optimal single score cutoffs obtained by maximising the value of TPR-FPR (first row) or by minimizing the value of  $(FPR-0)^2 + (TPR-1)^2$  (second row). In both optimization we used all reads from the mixture dataset 1. These optimal cutoffs were applied to the per-read data generated by each tool. For all these tools except for Tombo, if a read with a score above the optimal cutoff, we consider it as methylated, and unmethylated for the scores below the cutoff. For Tombo, a read is considered methylated if its score is below the optimal cutoff, and unmethylated for a score above the cutoff. For METEORE REG, both strategies led to exactly the same cutoffs.

|                                                                                       | Nanopolish    | DeepSignal    | Megalodon      | Tombo         | Guppy          | METEORE (RF) | METEORE (REG) |
|---------------------------------------------------------------------------------------|---------------|---------------|----------------|---------------|----------------|--------------|---------------|
| Remove <b>10%</b> of reads around the cross point of FPR and 1-TPR curves             | (-3.58 ,5.80) | (-0.60, 0.09) | (-2.14, -1.66) | (-0.54,0.34)  | (-1.93, -0.91) | (0.12,0.20)  | (0.33,0.53)   |
| Remove the reads that fall between the score at <b>1-TPR=0.05</b> and <b>FPR=0.05</b> | (-0.65, 3.53) | (-1.07, 0.60) | (-2.56, 3.39)  | (-1.82, 1.66) | (-2.41, -1.31) | (0.05,0.25)  | (0.36,0.51)   |

**Supp. Table 4.** Double score cutoffs obtained by removing 10% of reads around the intersection point of the FPR curve and 1-TPR curve (first row) or removing the cases that fall between the score at 1- TPR = 0.05 and FPR = 0.05 (second row). In the first optimization we used all reads from the mixture dataset 1. In the second optimization we used the fully methylated and fully unmethylated sets from mixture dataset 1. For each double cutoff (a,b), all sites in reads with score < a are considered unmethylated, with score > b are considered methylated, and all cases between these values are discarded. For Tombo the score scale has the opposite orientation, i.e. a read is considered methylated if its score is < a, and unmethylated for a score > b. METEORE (RF) is the combination of DeepSignal and Nanopolish using a random forest (parameters: max\_depth=3 and n\_estimator=10). METEORE (REG) is the combination of DeepSignal and Nanopolish using a regression model. In the REG model, filtering is symmetric by the ranking of scores about the tipping point, i.e. 5% of reads with scores lower than the tipping point and 5% of reads with scores higher than the tipping point.

| Chromosome | Start position | End position | Size (nt) | Target locus | Type of variants | Associated gene(s) |
|------------|----------------|--------------|-----------|--------------|------------------|--------------------|
| chr1       | 159199780      | 159212236    | 12456     | rs2814778    | aiSNP            | CADM3, ACKR1       |
| chr2       | 1480363        | 1494141      | 13778     | TPOX         | STR              | TPO                |
| chr4       | 99314722       | 99323024     | 8302      | rs1229984    | aiSNP            | ADH1B              |
| chr5       | 33944710       | 33959555     | 14845     | rs16891982   | piSNP            | SLC45A2            |
| chr6       | 392228         | 401463       | 9235      | rs12203592   | piSNP            | IPF4               |
| chr11      | 89258999       | 89295942     | 36943     | rs1393350    | piSNP            | TYR                |
| chr14      | 92303402       | 92323757     | 20355     | rs12896399   | piSNP            | SLC24A4            |
| chr15      | 27983280       | 27993166     | 9886      | rs1800407    | piSNP            | OCA2               |
| chr15      | 28112701       | 28130250     | 17549     | rs12913832   | piSNP            | HERC2              |
| chr21      | 43627562       | 43644088     | 16526     | PentaD       | STR              | HSF2BP             |

**Supp. Table 5. Ten forensically relevant regions used for the nCATS protocol.** The table provides the coordinates (GRCh38) of the ten regions used to sequence native DNA with the nCATS protocol. The table also indicates whether the region contains an ancestry-informative SNP (aiSNP), a phenotypic-informative SNP (piSNP), or a short tandem repeat (STR).

| Target     | Guide RNA sequence    | PAM | Cleaved site      |
|------------|-----------------------|-----|-------------------|
| rs12913832 | CTTGTTCTCAATCCAACGAG  | CGG | chr15:28112701(+) |
|            | GATCAGATGACCATGTTCTGA | AGG | chr15:28130250(-) |
| rs1800407  | GTAGAGCTCTAACTAAGTGG  | AGG | chr15:27983280(+) |
|            | TATCCAATCCTGCTGACCAG  | TGG | chr15:27993166(-) |
| rs12896399 | GCTGGAACGCCCCATCAACA  | CGG | chr14:92303402(+) |
|            | GAGTGCAATCAGTGGCCGAG  | CGG | chr14:92323757(-) |
| rs16891982 | TGTGATCACCACGACGACAA  | CGG | chr5:33944710(+)  |
|            | GAGTGCAACGAGGAACCTAAG | AGG | chr5:33959555(-)  |
| rs1393350  | TCCTTGCTGCACGAATCAGT  | GGG | chr11:89258999(+) |
|            | GCTGGATGTGTTATAGACGC  | TGG | chr11:89295942(-) |
| rs12203592 | TAAGGGGCCCAAGCTCACGG  | CGG | chr6:392228(+)    |
|            | ACGTGGTCAGCTCCTTCACG  | AGG | chr6:401463(-)    |
| TPOX       | CGTATTTGAAAGATCCACGG  | TGG | chr2:1480363(+)   |
|            | CTTACGTAAGAGTTGAATGG  | TGG | chr2:1494141(-)   |
| Penta D    | CGGTACCTATCCCAGAACTA  | TGG | chr21:43627562(+) |
|            | TAACACGTAGATCATTCCT   | TGG | chr21:43644088(-) |
| rs2814778  | CCTACCACGCCATCATCGGT  | GGG | chr1:159199780(+) |
|            | GCAATTGTCTTTCAGTGCGT  | TGG | chr1:159212236(-) |
| rs1229984  | ACCATCTGCTAACACGTATG  | AGG | chr4:99314772(+)  |
|            | GCGTTAACATATCTCCACAA  | GGG | chr4:99323024(-)  |

**Supplementary Table 6. Guide RNA (gRNA) panel used for the nCATs protocol.** The table describe the ten pairs of gRNAs used to target the ten regions from Supp. Table 3. To enrich for each target region, two gRNAs were used to make a cut on each side, one upstream of the region of interest targeting the positive strand, and the other one downstream targeting the negative strand.

|               | <i>N</i> | <i>r</i> | <i>r</i> <sup>2</sup> | $\rho$ | <i>RMSE</i> |
|---------------|----------|----------|-----------------------|--------|-------------|
| Nanopolish    | 2171     | 0.9463   | 0.8954                | 0.8106 | 0.1490      |
| DeepSignal    | 2171     | 0.9651   | 0.9315                | 0.8147 | 0.1252      |
| Megalodon     | 2171     | 0.9515   | 0.9054                | 0.8115 | 0.1517      |
| Tombo         | 2164     | 0.8694   | 0.7559                | 0.7326 | 0.2390      |
| Guppy         | 2171     | 0.9377   | 0.8792                | 0.8004 | 0.2121      |
| DeepMod       | 2171     | 0.8479   | 0.7190                | 0.7589 | 0.2585      |
| METEORE (RF)  | 2171     | 0.9657   | 0.9326                | 0.8161 | 0.1241      |
| METEORE (REG) | 2171     | 0.9637   | 0.9288                | 0.8132 | 0.1297      |

**Supp. Table 7. Comparison of CpG methylation frequencies from whole genome bisulfite sequencing (WGBS) Illumina data with Cas9-targeted Nanopore data from Gilpatrick et al. 2020.** For each tool we provide the number of sites (*N*), the Pearson's correlation (*r*), coefficient of determination (*r*<sup>2</sup>), the Spearman's rank correlation ( $\rho$ ), and the root mean square error (RMSE) for the comparison of the percentage methylation predicted from Nanopore with the percentage methylation calculated from whole genome bisulfite sequencing (WGBS) data. We show the results for five tested tools and METEORE combining DeepSignal and Nanopolish using a random forest (RF) (parameters: max\_depth=3 and n\_estimator=10) or a regression (REG) model.

|               | <i>N</i> | <i>r</i> | <i>r</i> <sup>2</sup> | $\rho$ | <i>RMSE</i> |
|---------------|----------|----------|-----------------------|--------|-------------|
| Nanopolish    | 1724     | 0.8648   | 0.7478                | 0.8362 | 0.2171      |
| DeepSignal    | 1731     | 0.9196   | 0.8456                | 0.8785 | 0.1693      |
| Megalodon     | 1724     | 0.7294   | 0.5320                | 0.7704 | 0.3642      |
| Tombo         | 1734     | 0.8037   | 0.6460                | 0.7871 | 0.2551      |
| Guppy         | 1738     | 0.7706   | 0.5938                | 0.7741 | 0.2978      |
| METEORE (RF)  | 1724     | 0.8998   | 0.8096                | 0.8568 | 0.1881      |
| METEORE (REG) | 1724     | 0.9183   | 0.8433                | 0.8771 | 0.1699      |

**Supp. Table 8. Comparison of CpG methylation frequencies from whole genome bisulfite sequencing (WGBS) Illumina data with Cas9-targeted Nanopore data for each method using optimal thresholds obtained by the maximum value of (TPR-FPR).** We used the score cutoffs that maximized TPR-FPR in the mixture dataset 1 (Supp. Table 3). For each method we provide the number of sites (*N*), the Pearson's correlation (*r*), coefficient of determination (*r*<sup>2</sup>), the Spearman's rank correlation ( $\rho$ ), and the root mean square error (RMSE) for the comparison of the percentage methylation predicted from Nanopore with the percentage methylation calculated from whole genome bisulfite sequencing (WGBS) data. We show the results for five tested tools and METEORE combining DeepSignal and Nanopolish using a random forest (RF) (parameters: max\_depth=3 and n\_estimator=10) or a regression (REG) model.

|               | <i>N</i> | <i>r</i> | <i>r</i> <sup>2</sup> | $\rho$ | <i>RMSE</i> |
|---------------|----------|----------|-----------------------|--------|-------------|
| Nanopolish    | 1621     | 0.8726   | 0.7614                | 0.8327 | 0.2165      |
| DeepSignal    | 1731     | 0.9220   | 0.8500                | 0.8805 | 0.1698      |
| Megalodon     | 1721     | 0.6855   | 0.4699                | 0.7344 | 0.4021      |
| Tombo         | 1733     | 0.8150   | 0.6642                | 0.7924 | 0.2468      |
| Guppy         | 1733     | 0.7345   | 0.5394                | 0.7275 | 0.3243      |
| METEORE (RF)  | 1575     | 0.0721   | 0.0052                | 0.0536 | 0.6496      |
| METEORE (REG) | 1724     | 0.9240   | 0.8537                | 0.8832 | 0.1661      |

**Supp. Table 9. Comparison of CpG methylation frequencies from whole genome bisulfite sequencing (WGBS) Illumina data with Cas9-targeted Nanopore data for each method using the double cutoff obtained by discarding 10% of reads.** For each site, we removed the 10% of reads with scores closest to the cross point of the FPR and 1-TPR curves in the mixture dataset 1 (Supp. Table 4). For each method we provide the number of sites (*N*), the Pearson’s correlation (*r*), coefficient of determination (*r*<sup>2</sup>), the Spearman’s rank correlation ( $\rho$ ), and the root mean square error (*RMSE*) for the comparison of the percentage methylation predicted from Nanopore with the percentage methylation calculated from whole genome bisulfite sequencing (WGBS) data. METEORE is the combination model with the adjusted parameters of a random forest (max\_depth=3 and n\_estimator=10) combining DeepSignal and Nanopolish.

|                 | No. of CPUs used | Real time per CPU<br>(min) | Peak memory<br>(GB) | Bases per second |
|-----------------|------------------|----------------------------|---------------------|------------------|
| Nanopolish      | 2                | 10.2                       | 0.2                 | 25433            |
| DeepSignal      | 9                | 334.8                      | 23.7                | 775              |
| Tombo           | 9                | 30.4                       | 23.6                | 8533             |
| Megalodon       | 11               | 3258.7                     | 1.4                 | 80               |
| Megalodon (GPU) | 1 GPU            | 4.0 per GPU                | 1.7                 | 66516            |
| Guppy           | 11               | 1494.6                     | 3.3                 | 174              |
| Guppy (GPU)     | 1 GPU            | 7.0 per GPU                | 0.6                 | 37596            |
| DeepMod         | 8                | 176.0                      | 2.5                 | 1474             |

**Supp. Table 10. Runtime and memory usage for each tested tool.** We tested each pipeline on the m50 set (2,432 reads and a total of 15,564,827 bases) from the mixture dataset 1. We recorded the real time (wall clock time) from start to finish of the pipeline/command(s), which took a fast5 directory as an input and output a prediction at genome level (i.e. methylation frequency for each site). We ran Nanopolish, DeepSignal, Tombo, Megalodon, Guppy and DeepMod on a computer with 12 CPU processors (Intel Core i7 (8th Gen) 8700 @ 3.2 GHz). Guppy can be run on CPUs or GPUs, but on a GPU the basecalling speed increase significantly. Megalodon requires Guppy for the basecalling step and uses GPU-enabled Guppy by default. If Megalodon is used with Guppy (CPU), the --guppy-timeout argument should be specified (here we used 200 seconds) to allow sufficient time for calling a read during CPU basecalling. Additionally, we ran Megalodon and Guppy on another computer with a GPU (GeForce RTX 2080 Ti) and 32 CPU processors (AMD Ryzen threadripper

2950x). Real time per CPU = real (wall-clock) time taken x no. of CPUs. Bases per second = total no. of bases/(real time per CPU x 60).
